# Supplementary material for: LGHAP v2: a global gap-free aerosol optical depth and PM 2.5 concentration dataset since 2000 derived via big Earth data analytics
Source: Copernicus journal article supplement (doi:10.5194/essd-16-2425-2024), 2024-05-22
Supplement: Supplementary file 1 [file essd-16-2425-2024-supplement.pdf]

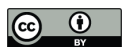

*Supplement of*

## **LGHAP v2: a global gap-free aerosol optical depth and PM<sub>2.5</sub> concentration dataset since 2000 derived via big Earth data analytics**

**Kaixu Bai et al.**

*Correspondence to:* Kaixu Bai (kxbai@geo.ecnu.edu.cn) and Jianping Guo (jpguocams@gmail.com)

The copyright of individual parts of the supplement might differ from the article licence.

## 1 S1. Multisource data homogenization

2 Given excessive missing values in satellite-based AOD retrievals, it is advisable to improve the gap-filling accuracy by  
3 increasing the data abundance via an integration of external observations. Benefiting from the powerful approximation capacity  
4 of machine learning algorithms, a set of machine-learned regression models were established using the random forest model  
5 to generate MODIS-like AOD estimates from diverse data sources, aiming at providing critical prior information to facilitate  
6 AOD gap-filling, especially over regions with massive data voids. Specifically,  $AOD_{Terra}$  observations were deemed the  
7 response variable, while AOD-related data ( $AR$ ) from other satellites, MERRA-2 simulations, and in-situ air quality  
8 measurements were used as the critical predictors, alongside meteorological and geographic factors. The machine-learned  
9 models can be expressed as follows.

$$10 \quad AOD_{Terra} \sim RF(AR, MET, AER, LULC, DEM, NDVI, POP, month) \quad (S1)$$

11 where  $MET$ ,  $AER$ ,  $LULC$ ,  $DEM$ ,  $NDVI$ ,  $POP$ , and  $month$  refer to meteorological variables, numerical aerosol component  
12 simulations, land use and land cover, elevation, vegetation index, population, and month identifier, respectively.

13 By taking advantage of these data-specific machine learning models, gridded AOD products from diverse satellites and  
14 numeric simulations were harmonized to supplement  $AOD_{Terra}$  by correcting for both the scaling effect (varied spatial  
15 resolution) and cross-sensor biases. More importantly, virtual AOD observations were derived from in situ air quality  
16 measurements, providing additional AOD prior information to facilitate AOD gap-filling, especially over regions without  
17 satellite-based AOD observations. This homogenization approach greatly favors the assimilation of multisensory AODs and  
18 heterogenous air quality data (Bai et al., 2022a; Li et al., 2022a).

## S2. Scene-aware ensemble learning graph attention network (SCAGAT) for global PM<sub>2.5</sub> mapping

To accommodate global big Earth observations and to account for spatial representativeness in the model extrapolation, we developed a novel SCene-Aware ensemble learning Graph Attention neTwork (SCAGAT) model for global PM<sub>2.5</sub> concentration mapping. The workflow of this method is illustrated in Figure S4. Differing from previous data-driven models, which were established using either all available data (global model) or regional observations (regional model), the SCAGAT model was dedicated to solving the scale problem in large-scale modeling practices (e.g., global PM<sub>2.5</sub> modeling in this study). This approach avoids the determination of the scale (i.e., the boundary size like city, province, national, and global) for selecting proper training samples for constructing an appropriate training set for data-driven models. In the following, we briefly introduced the technical flows of the SCAGAT model.

Firstly, we established the PM<sub>2.5</sub> estimation model at each individual air quality monitoring site using the random forest method given its good approximation capacity. Specifically, ground-measured PM<sub>2.5</sub> concentrations were used as the learning target while the collocated AOD from the LGHAP v2 dataset were used as the proxy variable, along with a set of explainable variables. The site-specific PM<sub>2.5</sub> estimation models can be formulated as:

$$PM_{2.5} \sim RF(AOD, MET, AER, LULC, DEM, NDVI, POP, month) \quad (S2)$$

Therefore, tens of thousands of site-specific PM<sub>2.5</sub> concentration estimation models were established at the local scale across the globe.

Secondly, an adjacency matrix was calculated between each footprint of gap-filled AOD<sub>Terra</sub> and monitoring sites overlaid grids in reference to nine distinct features indicating the scene attribute of each grid cell, including *latitude, longitude, AOD, relative humidity, air temperature, NDVI, elevation, population, and land use and land cover ratio*. Specifically, the high-dimension Euclidian distance was calculated between grids on the basis of these normalized features. The assumption is that the nonlinear interactions between AOD and PM<sub>2.5</sub> may comply with a similar relationship over scenes with comparable ambient environment. Therefore, PM<sub>2.5</sub> concentration over one grid could be estimated from models trained over sites with scene features similar to this given grid.

Thirdly, a graph attention network was then employed to integrate multiple PM<sub>2.5</sub> estimates derived from a set of site-specific models with similar scene features. Specifically, PM<sub>2.5</sub> estimates from 32 models with similar scene features were used as the learning input, while the normalized attribute differences were used as the weights in the adjacency matrix, and the testing accuracy of each random forest model was used as the node bias. During the graph network training, the model utilized attention operations to discern crucial associations between scene attributes, and the model was continuously optimized by adjusting graph structures and incorporating residual connections. A global pooling layer was then employed to amalgamate contextual data from all nodes.

Distinct from other learning models, the proposed SCAGAT model takes advantage of powerful approximation capacity of random forest and accounts for the scene representativeness of each data-driven model. More importantly, the SCAGAT model is capable of accurately predicting PM<sub>2.5</sub> concentration even over regions without monitoring sites.

52

53

**Table S1.** Data accuracy of raw AOD datasets used for generating global gap-free LGHAP v2 AOD dataset by comparing against AOD observations from AERONET during 2000–2021.

| Dataset                                                 | Region        | Mean AOD | Number of monitors | Number of samples | R    | RMSE | Bias  | Below EE (%) | Within EE (%) | Above EE (%) |
|---------------------------------------------------------|---------------|----------|--------------------|-------------------|------|------|-------|--------------|---------------|--------------|
| MCD19A2 (Aqua)                                          | Global        | 0.17     | 1335               | 341254            | 0.88 | 0.11 | 0.01  | 12.11        | 75.45         | 12.44        |
|                                                         | North America | 0.11     | 433                | 94531             | 0.87 | 0.07 | -0.01 | 3.72         | 82.54         | 13.74        |
|                                                         | South America | 0.11     | 81                 | 20537             | 0.93 | 0.07 | 0.00  | 9.46         | 77.61         | 12.93        |
|                                                         | Europe        | 0.11     | 208                | 83773             | 0.81 | 0.06 | 0.02  | 10.69        | 83.42         | 5.90         |
|                                                         | Asia          | 0.32     | 321                | 79146             | 0.90 | 0.14 | 0.00  | 15.53        | 67.80         | 16.67        |
|                                                         | Africa        | 0.21     | 110                | 40867             | 0.78 | 0.19 | 0.05  | 29.20        | 56.75         | 14.05        |
|                                                         | Australia     | 0.09     | 28                 | 10272             | 0.79 | 0.06 | -0.02 | 4.81         | 76.71         | 18.48        |
| VIIRS/NPP                                               | Global        | 0.19     | 1335               | 204573            | 0.90 | 0.11 | -0.01 | 9.68         | 75.58         | 14.73        |
|                                                         | North America | 0.12     | 433                | 69371             | 0.86 | 0.12 | -0.01 | 6.76         | 81.61         | 11.63        |
|                                                         | South America | 0.08     | 81                 | 15326             | 0.81 | 0.07 | 0.03  | 18.93        | 75.61         | 5.46         |
|                                                         | Europe        | 0.13     | 208                | 45874             | 0.82 | 0.06 | -0.01 | 4.42         | 83.62         | 11.96        |
|                                                         | Asia          | 0.38     | 321                | 42570             | 0.91 | 0.15 | -0.02 | 11.88        | 67.43         | 20.69        |
|                                                         | Africa        | 0.23     | 110                | 25183             | 0.89 | 0.13 | 0.00  | 17.00        | 61.47         | 21.53        |
|                                                         | Australia     | 0.11     | 28                 | 4409              | 0.58 | 0.11 | -0.04 | 3.38         | 65.28         | 31.34        |
| MISR/Terra                                              | Global        | 0.19     | 1335               | 79125             | 0.87 | 0.11 | 0.00  | 5.24         | 81.72         | 13.04        |
|                                                         | North America | 0.13     | 433                | 20839             | 0.79 | 0.09 | -0.02 | 1.76         | 82.12         | 16.13        |
|                                                         | South America | 0.13     | 81                 | 4526              | 0.89 | 0.12 | 0.00  | 4.20         | 87.38         | 8.42         |
|                                                         | Europe        | 0.14     | 208                | 18630             | 0.87 | 0.05 | 0.00  | 2.59         | 90.85         | 6.56         |
|                                                         | Asia          | 0.31     | 321                | 15792             | 0.85 | 0.18 | 0.02  | 12.61        | 72.44         | 14.96        |
|                                                         | Africa        | 0.25     | 110                | 10003             | 0.87 | 0.14 | 0.00  | 7.56         | 73.78         | 18.66        |
|                                                         | Australia     | 0.11     | 28                 | 2241              | 0.76 | 0.07 | -0.03 | 1.56         | 73.05         | 25.39        |
| PARASOL/<br>POLDER                                      | Global        | 0.30     | 1335               | 72120             | 0.86 | 0.18 | -0.08 | 4.02         | 54.12         | 41.87        |
|                                                         | North America | 0.21     | 433                | 15849             | 0.68 | 0.16 | -0.10 | 1.54         | 45.09         | 53.37        |
|                                                         | South America | 0.25     | 81                 | 3235              | 0.95 | 0.16 | -0.08 | 1.58         | 54.37         | 44.05        |
|                                                         | Europe        | 0.20     | 208                | 19960             | 0.72 | 0.12 | -0.05 | 3.47         | 63.65         | 32.88        |
|                                                         | Asia          | 0.51     | 321                | 17651             | 0.85 | 0.24 | -0.11 | 6.10         | 46.07         | 47.83        |
|                                                         | Africa        | 0.39     | 110                | 8108              | 0.83 | 0.20 | -0.07 | 7.24         | 56.18         | 36.58        |
|                                                         | Australia     | 0.10     | 28                 | 2171              | 0.69 | 0.07 | -0.03 | 1.89         | 71.44         | 26.67        |
| AATSR/<br>Envisat                                       | Global        | 0.19     | 1335               | 30870             | 0.83 | 0.11 | 0.00  | 10.05        | 76.91         | 13.04        |
|                                                         | North America | 0.12     | 433                | 7828              | 0.87 | 0.06 | 0.00  | 5.81         | 86.89         | 7.29         |
|                                                         | South America | 0.12     | 81                 | 1578              | 0.75 | 0.10 | 0.01  | 14.32        | 71.55         | 14.13        |
|                                                         | Europe        | 0.14     | 208                | 8139              | 0.84 | 0.06 | 0.01  | 9.23         | 85.17         | 5.60         |
|                                                         | Asia          | 0.31     | 321                | 5358              | 0.79 | 0.15 | 0.00  | 14.73        | 64.11         | 21.16        |
|                                                         | Africa        | 0.30     | 110                | 3672              | 0.79 | 0.20 | 0.00  | 18.57        | 61.55         | 19.88        |
|                                                         | Australia     | 0.13     | 28                 | 997               | 0.36 | 0.13 | -0.05 | 4.01         | 61.79         | 34.20        |
| SeaWiFS/<br>OrbView-2                                   | Global        | 0.21     | 1335               | 21643             | 0.88 | 0.12 | 0.00  | 12.34        | 70.64         | 17.02        |
|                                                         | North America | 0.12     | 433                | 4885              | 0.73 | 0.08 | -0.02 | 5.69         | 75.78         | 18.53        |
|                                                         | South America | 0.17     | 81                 | 1158              | 0.93 | 0.13 | 0.03  | 25.47        | 68.83         | 5.70         |
|                                                         | Europe        | 0.16     | 208                | 3949              | 0.79 | 0.07 | 0.00  | 8.38         | 77.67         | 13.95        |
|                                                         | Asia          | 0.32     | 321                | 3972              | 0.77 | 0.15 | 0.00  | 20.62        | 58.26         | 21.12        |
|                                                         | Africa        | 0.34     | 110                | 3230              | 0.90 | 0.16 | 0.03  | 22.57        | 59.66         | 17.77        |
|                                                         | Australia     | 0.07     | 28                 | 717               | 0.34 | 0.09 | 0.00  | 11.30        | 73.92         | 14.78        |
| AOD estimates derived<br>from air quality<br>indicators | Global        | 0.19     | 1335               | 203153            | 0.84 | 0.14 | 0.01  | 14.08        | 70.57         | 15.35        |
|                                                         | North America | 0.13     | 433                | 39913             | 0.78 | 0.11 | -0.01 | 6.27         | 76.09         | 17.64        |
|                                                         | South America | 0.11     | 81                 | 18282             | 0.81 | 0.10 | 0.02  | 17.27        | 71.44         | 11.29        |
|                                                         | Europe        | 0.12     | 208                | 61389             | 0.71 | 0.07 | 0.01  | 10.47        | 81.32         | 8.21         |
|                                                         | Asia          | 0.33     | 321                | 62283             | 0.84 | 0.19 | 0.03  | 20.41        | 61.96         | 17.62        |
|                                                         | Africa        | 0.23     | 110                | 19041             | 0.72 | 0.19 | 0.00  | 19.67        | 50.11         | 30.21        |
|                                                         | Australia     | 0.09     | 28                 | 2245              | 0.67 | 0.07 | -0.01 | 2.90         | 83.61         | 13.50        |

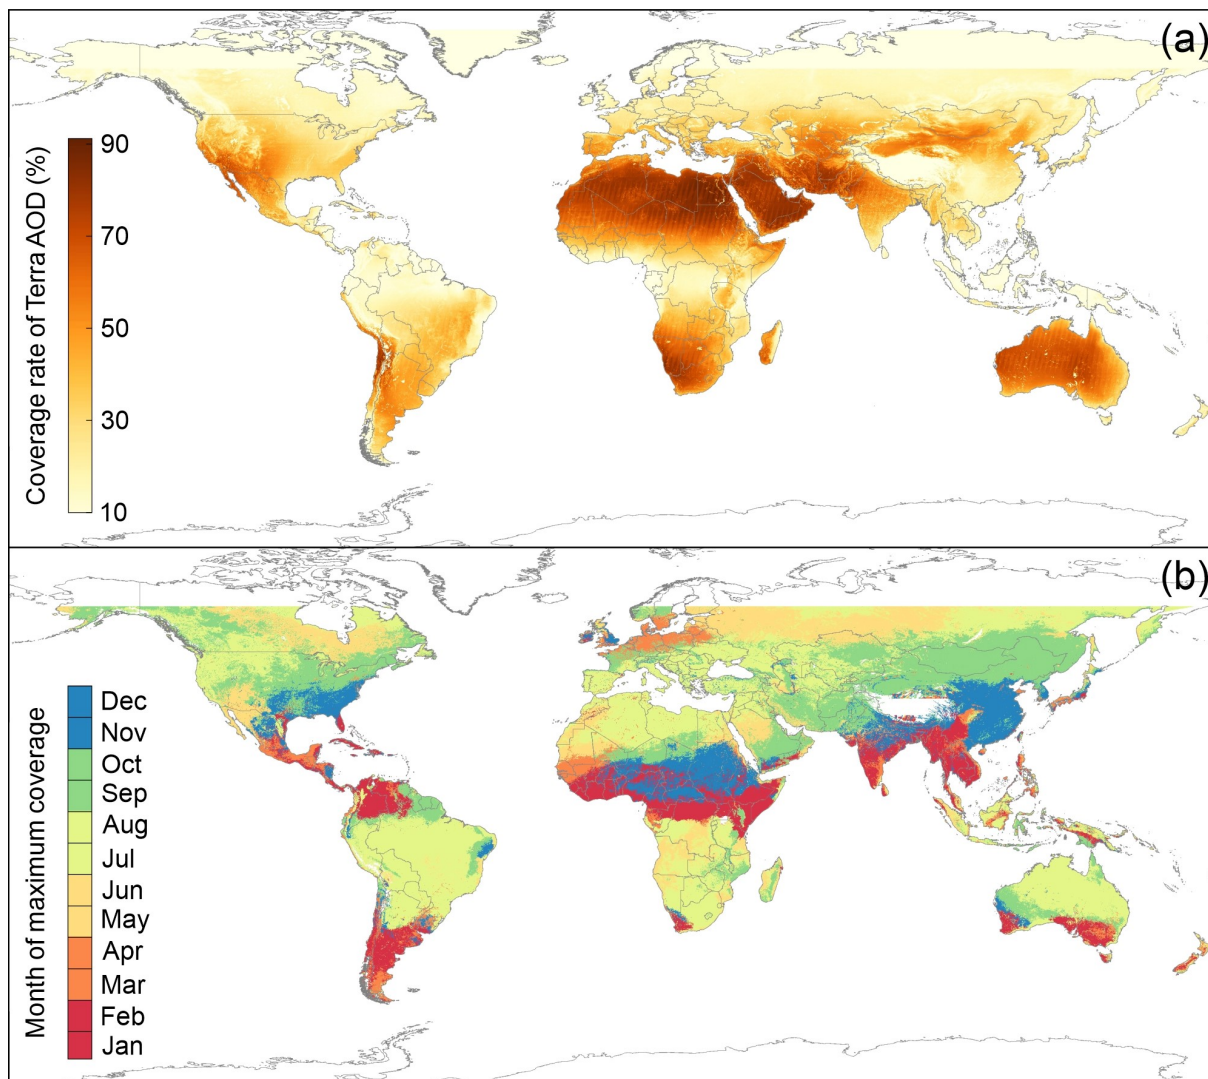

**Figure S1.** Spatial and temporal variations in AOD data coverage from Terra across the globe during 2000 to 2020.

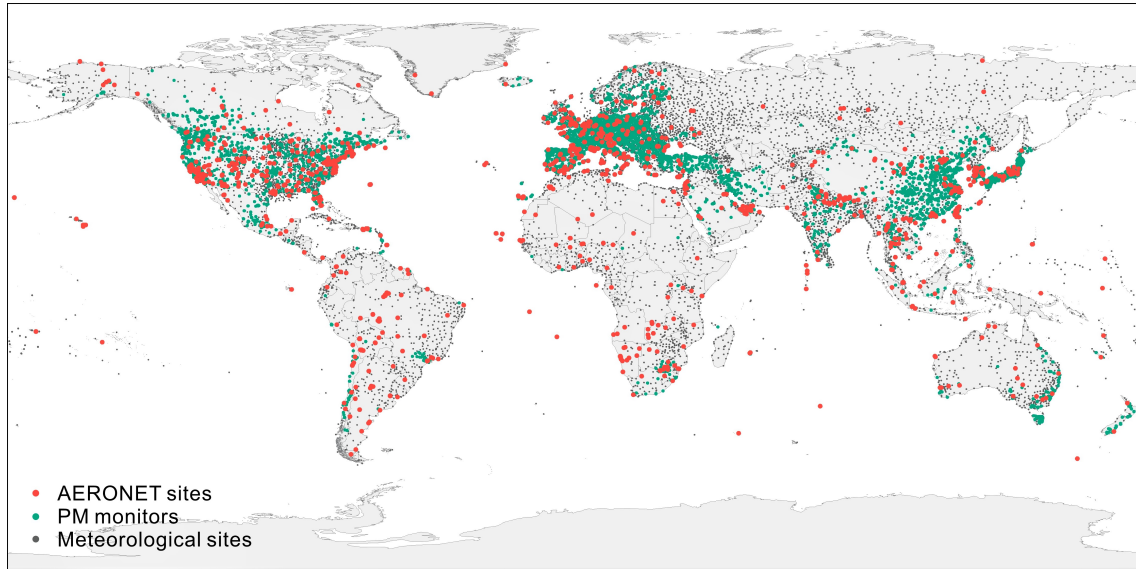

58

59

60

61

**Figure S2.** Spatial distribution of ground monitors providing AOD, PM, and atmospheric visibility used in this study across the globe.

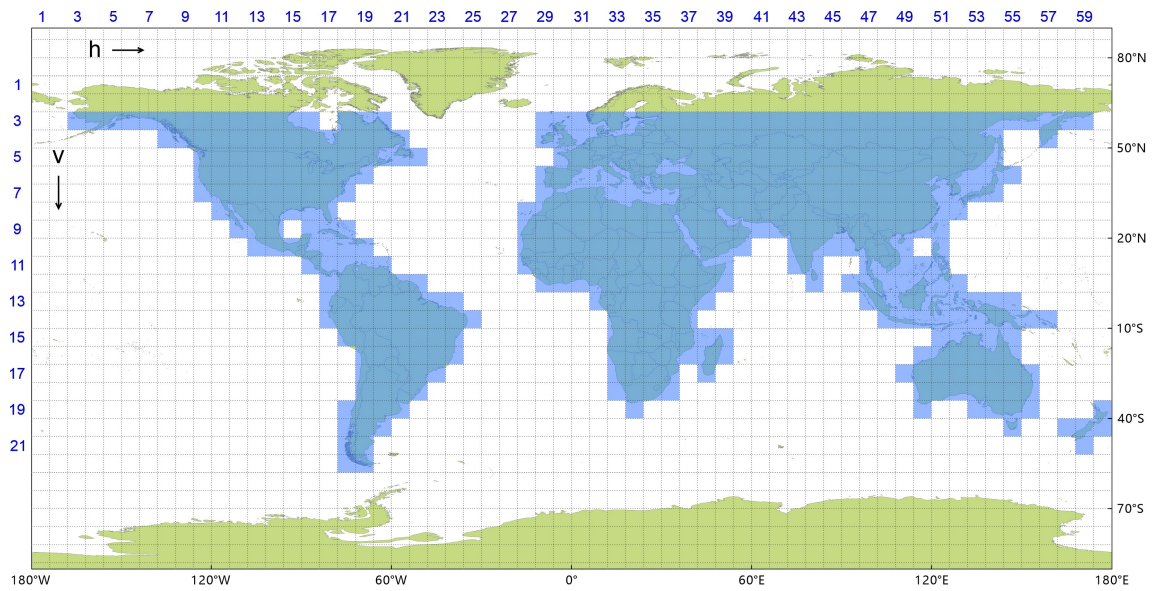

62

63 **Figure S3.** Spatial distribution of data tiles used for global-scale AOD gap-filling.

64

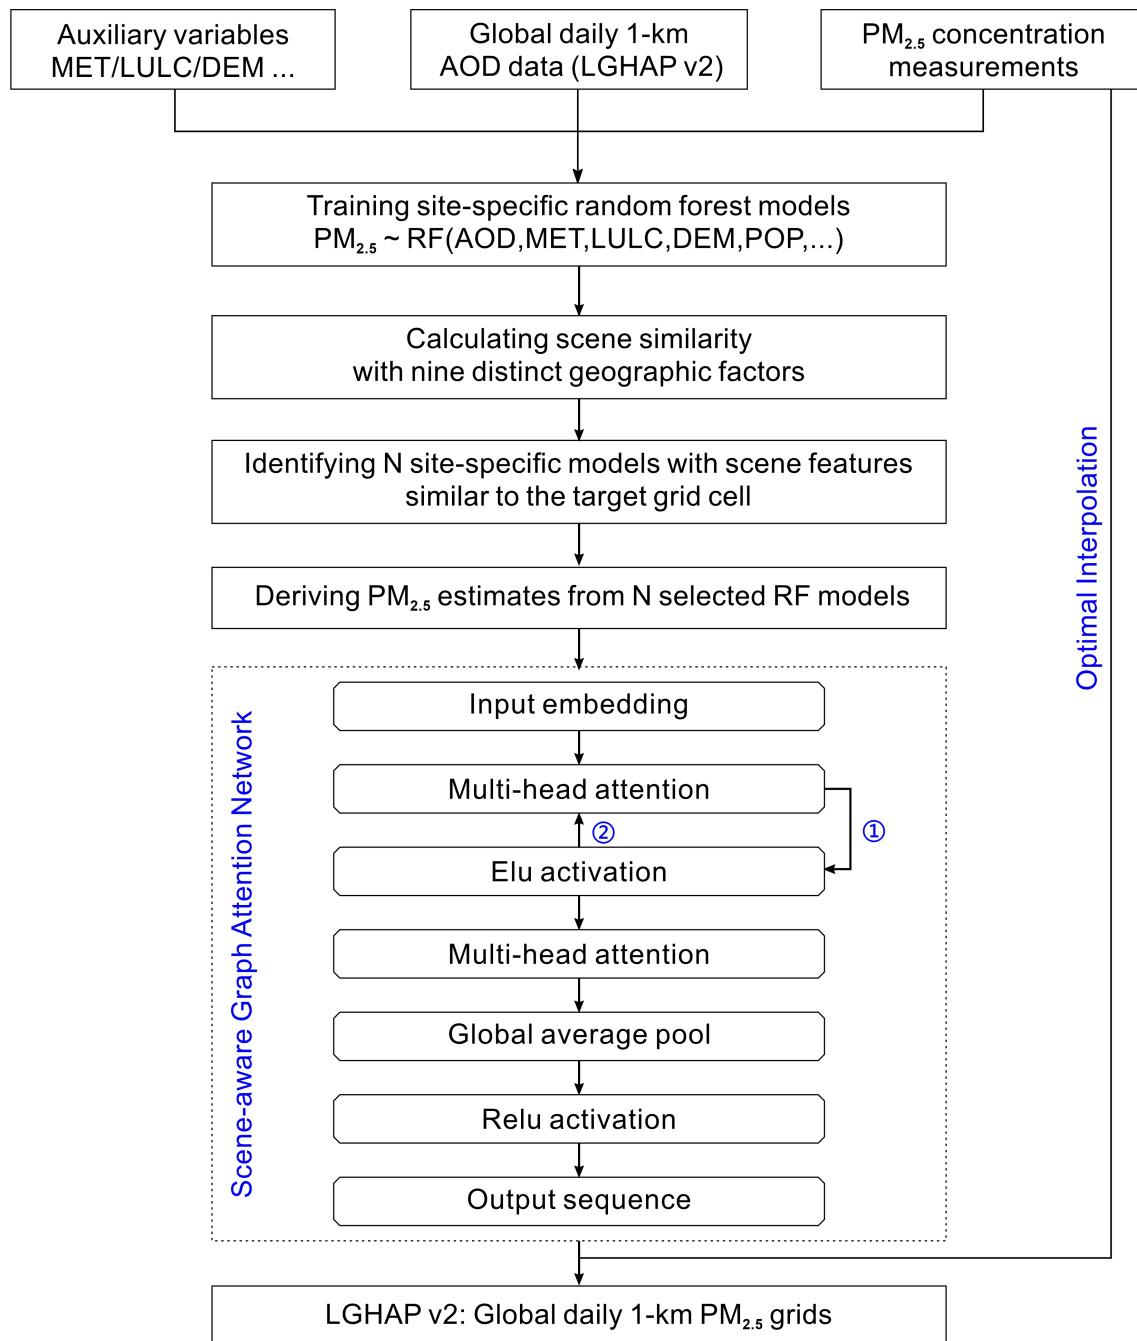

65

66

**Figure S4.** The flow chart of the scene-aware ensemble learning graph attention network (SCAGAT) model.

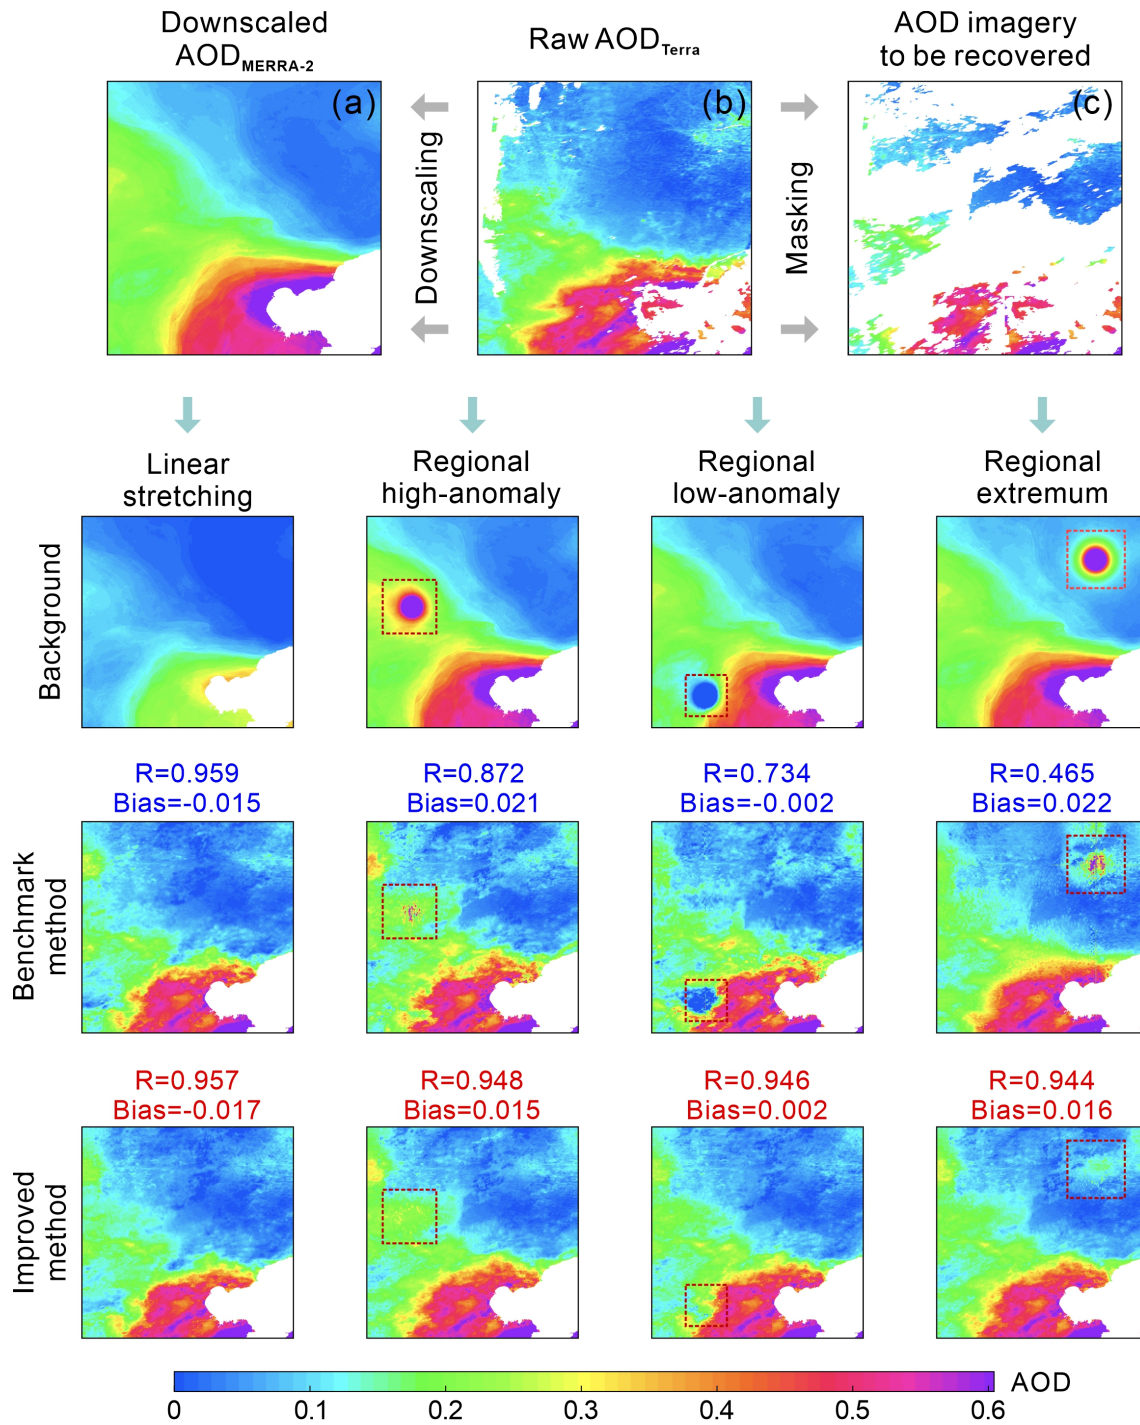

**Figure S5.** Performance evaluation of the adaptive background information updating module on improving AOD reconstruction patterns. Intercomparisons were conducted between the benchmark method (the method developed in Bai et al. (2022) to generate LGHAP v1 dataset in China) and the one embedding adaptive background information updating module.

72     **References**

- 73     Bai, K., Li, K., Ma, M., Li, K., Li, Z., Guo, J., Chang, N.-B., Tan, Z., and Han, D.: LGHAP: the Long-term Gap-free High-  
74             resolution Air Pollutant concentration dataset, derived via tensor-flow-based multimodal data fusion, *Earth Syst Sci*  
75             *Data*, 14, 907–927, <https://doi.org/10.5194/essd-14-907-2022>, 2022.
- 76     Li, K., Bai, K., Ma, M., Guo, J., Li, Z., Wang, G., and Chang, N.-B.: Spatially gap free analysis of aerosol type grids in China:  
77             First retrieval via satellite remote sensing and big data analytics, *ISPRS Journal of Photogrammetry and Remote Sensing*,  
78             193, 45–59, <https://doi.org/10.1016/j.isprsjprs.2022.09.001>, 2022.

79
